# Supplementary material for: Association of RAGE gene multiple variants with the risk for COPD and asthma in northern Han Chinese
Source: publisher site journal article supplement (doi:10.18632/aging.101975), 2019-05-29
Supplement: Supplementary file [file aging-v11i10-101975-supplementary-material-SD1.pdf]

SUPPLEMENTARY MATERIAL

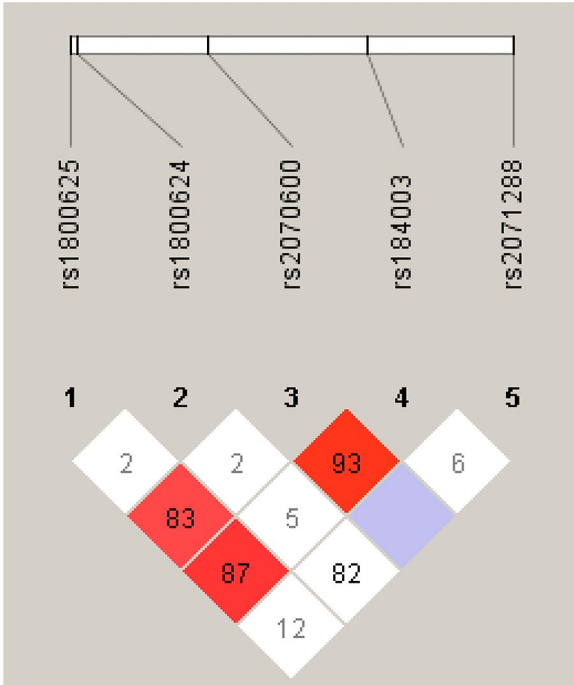

**Supplementary Figure 1. Linkage disequilibrium graph of five studied variants in RAGE gene in northern Han Chinese.** Pairwise linkage disequilibrium is expressed as D' (different colors) and r2 (numbers). Abbreviations: COPD, chronic obstructive pulmonary disease.
